# Supplementary material
Source: PubMed Central journal article supplement (PMC5055875)
Supplement: NIHMS820108-supplement-Supplemental_Information.pdf [file NIHMS820108-supplement-Supplemental_Information.pdf]

## Appendix 1. Sample Selection

Singleton live birth cohort, 2005-2011, California N=3,767,337

**Women with two or more singletons**

N=700,634 women with 1,247,434 births

**Linked to hospital discharge data**

N=489,787 women with 1,036,587 births

**Nulligravid and nulliparous at the first pregnancy and primigravid and primiparous at the second pregnancy**

N=234,020 women and 234,020 sibling pairs

**Gestational age 20 to 44 weeks in both pregnancies**

N=221,776 women and 221,776 sibling pairs

**Infant had no major malformations**

N=213,212 women and 213,212 sibling pairs

**Not missing maternal and obstetric factors in both pregnancies**

N=163,889 women and 163,889 sibling pairs

Yang J, Baer RJ, Berghella V, Chambers C, Chung P, Coker T, et al. Recurrence of preterm birth and early term birth. *Obstet Gynecol* 2016; 128.

The authors provided this information as a supplement to their article.

## Appendix 2. Characteristics of Mothers and Infants

| Characteristics                                | N       | %     |
|------------------------------------------------|---------|-------|
| Sample*                                        | 163,889 | 100.0 |
| Maternal race or ethnicity                     |         |       |
| White Not Hispanic                             | 55,144  | 33.7  |
| Hispanic                                       | 71,778  | 43.8  |
| Asian                                          | 27,898  | 17.0  |
| Two or more                                    | 3,659   | 2.2   |
| Black                                          | 3,156   | 1.9   |
| Other                                          | 1,228   | 0.8   |
| Hawaiian                                       | 534     | 0.3   |
| American Indian or Alaska Native               | 492     | 0.3   |
| Maternal age at the first pregnancy<br>(years) |         |       |
| Less than 18                                   | 8,438   | 5.2   |
| 18 to 34                                       | 144,456 | 88.1  |
| 35 or more                                     | 10,995  | 6.7   |

Yang J, Baer RJ, Berghella V, Chambers C, Chung P, Coker T, et al. Recurrence of preterm birth and early term birth. *Obstet Gynecol* 2016; 128.

The authors provided this information as a supplement to their article.

|                                                         |         |      |
|---------------------------------------------------------|---------|------|
| Medi-Cal for delivery                                   |         |      |
| Both pregnancies                                        | 49,982  | 30.5 |
| First pregnancy only                                    | 9,626   | 5.9  |
| Second pregnancy only                                   | 8,908   | 5.4  |
| Neither                                                 | 95,373  | 58.2 |
| Completed years of education at the<br>second pregnancy |         |      |
| Less than 12                                            | 30,110  | 18.4 |
| 12                                                      | 34,866  | 21.3 |
| More than 12                                            | 98,913  | 60.4 |
| Any preterm birth (before 37 weeks)                     |         |      |
| Both pregnancies                                        | 1,349   | 0.8  |
| First pregnancy only                                    | 8,018   | 4.9  |
| Second pregnancy only                                   | 5,552   | 3.4  |
| Neither <sup>†</sup>                                    | 148,970 | 90.9 |
| Any early term birth (37 to 38 weeks)                   |         |      |
| Both pregnancies                                        | 13,582  | 8.3  |

Yang J, Baer RJ, Berghella V, Chambers C, Chung P, Coker T, et al. Recurrence of preterm birth and early term birth. *Obstet Gynecol* 2016; 128.

The authors provided this information as a supplement to their article.

|                       |        |      |
|-----------------------|--------|------|
| First pregnancy only  | 22,435 | 13.7 |
| Second pregnancy only | 30,319 | 18.5 |
| Neither‡              | 97,553 | 59.5 |

---

\* Value missing where the sum of numbers for categories do not equal the total sample size.

† 37 or more weeks in both pregnancies.

‡ Preterm birth (before 37 weeks) or late term birth (39 or more weeks) in both pregnancies.

Yang J, Baer RJ, Berghella V, Chambers C, Chung P, Coker T, et al. Recurrence of preterm birth and early term birth. *Obstet Gynecol* 2016; 128.

The authors provided this information as a supplement to their article.

### Appendix 3. Maternal Characteristics Across Both Pregnancies

| Characteristics                             | Gestational week at birth of the second pregnancy |                               |                                           |                             |
|---------------------------------------------|---------------------------------------------------|-------------------------------|-------------------------------------------|-----------------------------|
|                                             | Before 32                                         | 32 to 36                      | 37 to 38                                  | 39 or more                  |
|                                             | N (%)<br>OR (95% CI)                              | N (%)<br>OR (95% CI)          | N (%)<br>OR (95% CI)                      | N (%)                       |
| Sample*                                     | 1,167                                             | 9,686                         | 61,747                                    | 149,176                     |
| Maternal age (years) at the first pregnancy |                                                   |                               |                                           |                             |
| Less than 18                                | 126 (10.8)<br>1.9 (1.6-2.3)                       | 806 (8.3)<br>1.4 (1.3-1.5)    | 4,052 (6.6)<br>1.1 (1.0-1.1) <sup>†</sup> | 9,229 (6.2)                 |
| 18 to 34                                    | 927 (79.4)                                        | 8,212 (84.8)                  | 53,273 (86.3)                             | 129,909 (87.1)<br>Reference |
| 35 or more                                  | 114 (9.8)<br>1.6 (1.3-1.9)                        | 668 (6.9)<br>1.1 (1.0-1.1)    | 4,422 (7.2)<br>1.1 (1.0-1.1) <sup>†</sup> | 10,034 (6.7)                |
| Maternal race or ethnicity                  |                                                   |                               |                                           |                             |
| American Indian or Alaska Native            | 6 (0.5)<br>2.6 (1.1-5.8)                          | 29 (0.3)<br>1.2 (0.9-1.8)     | 205 (0.3)<br>1.2 (1.0-1.5) <sup>†</sup>   | 489 (0.3)                   |
| Asian                                       | 213 (18.6)<br>2.0 (1.6-2.4)                       | 1,731 (18.2)<br>1.6 (1.5-1.7) | 11,876 (19.5)<br>1.5 (1.5-1.6)            | 22,605 (15.4)               |
| Black                                       | 52 (4.5)<br>3.1 (2.3-4.2)                         | 288 (3.0)<br>1.7 (1.5-2)      | 1,348 (2.2)<br>1.1 (1.1-1.2)              | 3,464 (2.4)                 |
| Hawaiian or Pacific Islander                | 5 (0.4)<br>1.9 (0.8-4.6)                          | 49 (0.5)<br>1.9 (1.4-2.5)     | 228 (0.4)<br>1.2 (1.04-1.4)               | 552 (0.4)                   |
| Hispanic                                    | 599 (52.4)                                        | 4,793 (50.3)                  | 28,657 (47.2)                             | 66,141 (45.1)               |

Yang J, Baer RJ, Berghella V, Chambers C, Chung P, Coker T, et al. Recurrence of preterm birth and early term birth. *Obstet Gynecol* 2016; 128.

The authors provided this information as a supplement to their article.

|                                   |                             |                               |                                             |                             |
|-----------------------------------|-----------------------------|-------------------------------|---------------------------------------------|-----------------------------|
|                                   | 1.9 (1.6-2.2)               | 1.5 (1.4-1.6)                 | 1.3 (1.2-1.3)                               |                             |
| Other                             | 6 (0.5)<br>1.1 (0.5-2.5)    | 91 (1.0)<br>1.7 (1.4-2.1)     | 518 (0.9)<br>1.3 (1.2-1.5)                  | 1,130 (0.8)                 |
| Two or more                       | 27 (2.4)<br>1.7 (1.1-2.5)   | 215 (2.3)<br>1.3 (1.2-1.5)    | 1,278 (2.1)<br>1.1 (1.0-1.2) <sup>†</sup>   | 3,366 (2.3)                 |
| White non-Hispanic                | 235 (20.6)                  | 2,333 (24.5)                  | 16,649 (27.4)                               | 48,997 (33.4)<br>Reference  |
| Maternal smoking                  |                             |                               |                                             |                             |
| Both pregnancies                  | 7 (0.6)<br>1.9 (0.9-4.1)    | 58 (0.6)<br>1.9 (1.5-2.5)     | 192 (0.3)<br>1.0 (0.8-1.2)                  | 472 (0.3)                   |
| First pregnancy only              | 21 (1.8)<br>1.7 (1.1-2.6)   | 107 (1.1)<br>1.0 (0.8-1.2)    | 650 (1.1)<br>1.0 (0.9-1.04)                 | 1,653 (1.1)                 |
| Second pregnancy only             | 29 (2.5)<br>1.7 (1.2-2.5)   | 208 (2.1)<br>1.5 (1.3-1.7)    | 1,037 (1.7)<br>1.1 (1.1-1.2)                | 2,184 (1.5)                 |
| Neither                           | 1,110 (95.1)                | 9,313 (96.1)                  | 59,868 (97.0)                               | 144,867 (97.1)<br>Reference |
| Inter-pregnancy interval (months) |                             |                               |                                             |                             |
| Less than 6                       | 205 (17.6)<br>3.3 (2.8-4.0) | 1,183 (12.2)<br>2.0 (1.8-2.1) | 5,168 (8.4)<br>1.2 (1.2-1.2)                | 10,679 (7.2)                |
| 6 to 23                           | 234 (20.1)<br>1.5 (1.2-1.7) | 1,988 (20.5)<br>1.3 (1.2-1.4) | 11,962 (19.4)<br>1.1 (1.0-1.1) <sup>†</sup> | 27,725 (18.6)               |

Yang J, Baer RJ, Berghella V, Chambers C, Chung P, Coker T, et al. Recurrence of preterm birth and early term birth. *Obstet Gynecol* 2016; 128.

The authors provided this information as a supplement to their article.

|                                                              |                            |                            |                             |                |
|--------------------------------------------------------------|----------------------------|----------------------------|-----------------------------|----------------|
| 24 to 47                                                     | 348 (29.8)                 | 3,392 (35.0)               | 24,470 (39.6)               | 60,400 (40.5)  |
|                                                              |                            |                            |                             | Reference      |
| 48 or more                                                   | 380 (32.6)                 | 3,123 (32.2)               | 20,147 (32.6)               | 50,372 (33.8)  |
|                                                              | 1.3 (1.1-1.5)              | 1.1 (1.1-1.2)              | 1.0 (1.0-1.01)              |                |
| Paternity change between pregnancies                         |                            |                            |                             |                |
| Yes                                                          | 54 (5.3)                   | 420 (4.8)                  | 2,218 (3.9)                 | 5,289 (3.8)    |
|                                                              | 1.4 (1.1-1.9)              | 1.3 (1.2-1.4)              | 1.0 (1.0-1.1)               |                |
| No                                                           | 966 (94.7)                 | 8,296 (95.2)               | 54,729 (96.1)               | 132,984 (96.2) |
|                                                              |                            |                            |                             | Reference      |
| Maternal complete years of education at the second pregnancy |                            |                            |                             |                |
| Less than 12                                                 | 337 (30.5)                 | 2,214 (23.7)               | 12,404 (20.8)               | 27,994 (19.4)  |
|                                                              | 2.0 (1.8-2.3)              | 1.4 (1.3-1.5)              | 1.1 (1.1-1.14) <sup>†</sup> |                |
| 12                                                           | 264 (23.9)                 | 2,291 (24.5)               | 13,401 (22.5)               | 31,789 (22.0)  |
|                                                              | 1.4 (1.2-1.6)              | 1.3 (1.2-1.3)              | 1.1 (1.0-1.08) <sup>†</sup> |                |
| More than 12                                                 | 503 (45.6)                 | 4,848 (51.8)               | 33,765 (56.7)               | 84,461 (58.6)  |
|                                                              |                            |                            |                             | Reference      |
| Mother birth place                                           |                            |                            |                             |                |
| Mexico                                                       | 352 (30.2)                 | 2,580 (26.6)               | 16,198 (26.2)               | 37,377 (25.1)  |
|                                                              | 1.4 (1.2-1.6)              | 1.1 (1.1-1.2)              | 1.1 (1.1-1.2)               |                |
| Outside of USA other                                         | 268 (23.0)                 | 2,203 (22.7)               | 15,352 (24.9)               | 32,443 (21.7)  |
|                                                              | 1.2 (1.0-1.4) <sup>†</sup> | 1.1 (1.0-1.2) <sup>†</sup> | 1.2 (1.2-1.3)               |                |
| USA                                                          | 547 (46.9)                 | 4,903 (50.6)               | 30,197 (48.9)               | 79,356 (53.2)  |
|                                                              |                            |                            |                             | Reference      |

Yang J, Baer RJ, Berghella V, Chambers C, Chung P, Coker T, et al. Recurrence of preterm birth and early term birth. *Obstet Gynecol* 2016; 128.

The authors provided this information as a supplement to their article.

|                       |                           |                               |                                |                            |
|-----------------------|---------------------------|-------------------------------|--------------------------------|----------------------------|
| Medi-Cal for delivery |                           |                               |                                |                            |
| Both pregnancies      | 487 (42.1)<br>1.7 (1.5-2) | 3,597 (37.3)<br>1.3 (1.3-1.4) | 20,903 (34.0)<br>1.1 (1.1-1.1) | 47,380 (31.9)              |
| First pregnancy       | 86 (7.4)<br>1.6 (1.3-2)   | 657 (6.8)<br>1.3 (1.2-1.4)    | 3,726 (6.1)<br>1.0 (1.0-1.1)   | 9,047 (6.1)                |
| Second pregnancy      | 87 (7.5)<br>1.7 (1.3-2.1) | 634 (6.6)<br>1.3 (1.2-1.4)    | 3,553 (5.8)<br>1.0 (1.0-1.1)   | 8,651 (5.8)                |
| Neither               | 498 (43.0)                | 4,752 (49.3)                  | 33,377 (54.2)                  | 83,666 (56.2)<br>Reference |

\* value missing where the sum of Ns for categories do not equal the total sample size.

† 95% confidence interval does not include 1.0.

Yang J, Baer RJ, Berghella V, Chambers C, Chung P, Coker T, et al. Recurrence of preterm birth and early term birth. *Obstet Gynecol* 2016; 128.

The authors provided this information as a supplement to their article.



#### Appendix 4. Obstetric Factors and Diagnoses Across Both Pregnancies

|                                               | Gestational week at birth of the second pregnancy |                            |                              |                             |
|-----------------------------------------------|---------------------------------------------------|----------------------------|------------------------------|-----------------------------|
|                                               | Before 32                                         | 32 to 36                   | 37 to 38                     | 39 or more                  |
|                                               | N (%)<br>OR (95% CI)                              | N (%)<br>OR (95% CI)       | N (%)<br>OR (95% CI)         | N (%)                       |
| Sample*                                       | 1,167                                             | 9,686                      | 61,747                       | 149,176                     |
| Any hypertension with or without preeclampsia |                                                   |                            |                              |                             |
| Both pregnancies                              | 71 (6.1)<br>7 (5.5-9)                             | 475 (4.9)<br>5.6 (5.1-6.3) | 1,363 (2.2)<br>2.4 (2.2-2.6) | 1,431 (1.0)                 |
| First pregnancy only                          | 49 (4.2)<br>0.9 (0.7-1.2)                         | 623 (6.4)<br>1.4 (1.3-1.5) | 3,557 (5.8)<br>1.1 (1.1-1.2) | 7,716 (5.2)                 |
| Second pregnancy only                         | 66 (5.7)<br>5.5 (4.3-7.1)                         | 443 (4.6)<br>4.5 (4.0-5.0) | 1,232 (2.0)<br>1.8 (1.7-2)   | 1,684 (1.1)                 |
| Neither                                       | 981 (84.1)                                        | 8,145 (84.1)               | 55,595 (90.0)                | 138,345 (92.7)<br>Reference |
| Preexisting hypertension without preeclampsia |                                                   |                            |                              |                             |
| Both pregnancies                              | 3 (0.3)<br>‡                                      | 21 (0.3)<br>1.9 (1.2-3)    | 116 (0.2)<br>1.5 (1.2-1.9)   | 188 (0.1)                   |
| First pregnancy only                          | 3 (0.3)<br>‡                                      | 26 (0.3)<br>1.5 (1.0-2.2)  | 142 (0.3)<br>1.2 (1.0-1.4)   | 301 (0.2)                   |
| Second pregnancy only                         | 4 (0.4)<br>‡                                      | 30 (0.4)<br>2.0 (1.4-2.9)  | 135 (0.2)<br>1.3 (1.1-1.6)   | 257 (0.2)                   |

Yang J, Baer RJ, Berghella V, Chambers C, Chung P, Coker T, et al. Recurrence of preterm birth and early term birth. *Obstet Gynecol* 2016; 128.

The authors provided this information as a supplement to their article.

|                                               |                              |                              |                              |                             |
|-----------------------------------------------|------------------------------|------------------------------|------------------------------|-----------------------------|
| Neither                                       | 981 (99.0)                   | 8,145 (99.1)                 | 55,595 (99.3)                | 138,345 (99.5)<br>Reference |
| Preexisting hypertension with preeclampsia    |                              |                              |                              |                             |
| Both pregnancies                              | 5 (0.5)<br>88.2 (28.8-269.9) | 13 (0.2)<br>27.6 (11.4-66.6) | 15 (0)<br>4.6 (2.0-10.9)     | 8 (0.0)                     |
| First pregnancy only                          | 4 (0.4)<br>‡                 | 15 (0.2)<br>3.4 (2.0-6.0)    | 58 (0.1)<br>2.0 (1.4-2.8)    | 74 (0.1)                    |
| Second pregnancy only                         | 4 (0.4)<br>‡                 | 11 (0.1)<br>5.5 (2.8-10.8)   | 29 (0.1)<br>2.1 (1.3-3.5)    | 34 (0.0)                    |
| Neither                                       | 981 (98.7)                   | 8,145 (99.5)                 | 55,595 (99.8)                | 138,345 (99.9)<br>Reference |
| Gestational hypertension without preeclampsia |                              |                              |                              |                             |
| Both pregnancies                              | 1 (0.1)<br>‡                 | 45 (0.5)<br>3.7 (2.7-5.2)    | 191 (0.3)<br>2.3 (1.9-2.8)   | 204 (0.1)                   |
| First pregnancy only                          | 16 (1.6)<br>0.8 (0.5-1.2)    | 225 (2.6)<br>1.3 (1.1-1.5)   | 1,279 (2.2)<br>1.1 (1.0-1.1) | 3,008 (2.1)                 |
| Second pregnancy only                         | 6 (0.6)<br>1.2 (0.5-2.7)     | 93 (1.1)<br>2.2 (1.8-2.8)    | 442 (0.8)<br>1.5 (1.4-1.7)   | 711 (0.5)                   |
| Neither                                       | 981 (97.7)                   | 8,145 (95.7)                 | 55,595 (96.7)                | 138,345 (97.2)<br>Reference |
| Gestational hypertension with preeclampsia    |                              |                              |                              |                             |
| Both pregnancies                              | 30 (2.8)                     | 170 (1.9)                    | 312 (0.5)                    | 208 (0.1)                   |

Yang J, Baer RJ, Berghella V, Chambers C, Chung P, Coker T, et al. Recurrence of preterm birth and early term birth. *Obstet Gynecol* 2016; 128.

The authors provided this information as a supplement to their article.

|                          |                              |                             |                              |                             |
|--------------------------|------------------------------|-----------------------------|------------------------------|-----------------------------|
|                          | 20.3 (13.8-30)               | 13.9 (11.3-17)              | 3.7 (3.1-4.4)                |                             |
| First pregnancy only     | 24 (2.2)<br>0.9 (0.6-1.3)    | 336 (3.8)<br>1.4 (1.3-1.6)  | 1,919 (3.3)<br>1.2 (1.1-1.3) | 3,964 (2.8)                 |
| Second pregnancy only    | 52 (4.8)<br>13.9 (10.4-18.6) | 300 (3.4)<br>9.7 (8.4-11.1) | 534 (0.9)<br>2.5 (2.2-2.8)   | 528 (0.4)                   |
| Neither                  | 981 (90.2)                   | 8,145 (91.0)                | 55,595 (95.3)                | 138,345 (96.7)<br>Reference |
| Unspecified hypertension |                              |                             |                              |                             |
| Both pregnancies         | 0 (0.0)<br>‡                 | 1 (0.0)<br>‡                | 6 (0.0)<br>2.5 (0.8-7.7)     | 6 (0.0)                     |
| First pregnancy only     | 2 (0.2)<br>‡                 | 21 (0.3)<br>1.0 (0.6-1.5)   | 159 (0.3)<br>1.1 (0.9-1.3)   | 369 (0.3)                   |
| Second pregnancy only    | 0 (0.0)<br>‡                 | 9 (0.1)<br>1.0 (0.5-1.9)    | 92 (0.2)<br>1.5 (1.1-1.9)    | 154 (0.1)                   |
| Neither                  | 981 (99.8)                   | 8,145 (99.6)                | 55,595 (99.5)                | 138,345 (99.6)<br>Reference |
| Any diabetes             |                              |                             |                              |                             |
| Both pregnancies         | 31 (2.7)<br>1.4 (0.9-1.9)    | 379 (3.9)<br>2.0 (1.8-2.2)  | 2,085 (3.4)<br>1.7 (1.6-1.8) | 3,055 (2.0)                 |
| First pregnancy only     | 48 (4.1)<br>1.9 (1.4-2.5)    | 294 (3.0)<br>1.4 (1.2-1.6)  | 1,661 (2.7)<br>1.2 (1.2-1.3) | 3,388 (2.3)                 |

Yang J, Baer RJ, Berghella V, Chambers C, Chung P, Coker T, et al. Recurrence of preterm birth and early term birth. *Obstet Gynecol* 2016; 128.

The authors provided this information as a supplement to their article.

|                       |                                        |                            |                              |                             |
|-----------------------|----------------------------------------|----------------------------|------------------------------|-----------------------------|
| Second pregnancy only | 57 (4.9)<br>1.4 (1.1-1.8)              | 543 (5.6)<br>1.6 (1.5-1.8) | 2,940 (4.8)<br>1.4 (1.3-1.4) | 5,372 (3.6)                 |
| Neither               | 1,031 (88.3)                           | 8,470 (87.4)               | 55,061 (89.2)                | 137,361 (92.1)<br>Reference |
| Preexisting diabetes  |                                        |                            |                              |                             |
| Both pregnancies      | 6 (0.6)<br>4.3 (1.9-9.7)               | 41 (0.5)<br>3.6 (2.5-5.0)  | 213 (0.4)<br>2.8 (2.3-3.5)   | 187 (0.1)                   |
| First pregnancy only  | 7 (0.7)<br>2 (0.9-4.2)                 | 49 (0.6)<br>1.7 (1.2-2.3)  | 246 (0.4)<br>1.3 (1.1-1.5)   | 474 (0.3)                   |
| Second pregnancy only | 7 (0.7)<br>3.5 (1.6-7.3)               | 39 (0.5)<br>2.3 (1.7-3.3)  | 163 (0.3)<br>1.5 (1.2-1.8)   | 270 (0.2)                   |
| Neither               | 1,031 (98.1)                           | 8,470 (98.5)               | 55,061 (98.9)                | 137,361 (99.3)<br>Reference |
| Gestational diabetes  |                                        |                            |                              |                             |
| Both pregnancies      | 25 (2.2)<br>1.2 (0.8-1.8)              | 318 (3.3)<br>1.9 (1.7-2.1) | 1,718 (2.8)<br>1.6 (1.5-1.7) | 2,707 (1.8)                 |
| First pregnancy only  | 47 (4.1)<br>2 (1.5-2.6)                | 270 (2.8)<br>1.4 (1.2-1.6) | 1,560 (2.5)<br>1.2 (1.1-1.3) | 3,197 (2.2)                 |
| Second pregnancy only | 52 (4.5)<br>1.3 (1.0-1.8) <sup>†</sup> | 519 (5.4)<br>1.6 (1.5-1.8) | 2,858 (4.7)<br>1.4 (1.3-1.4) | 5,230 (3.5)                 |
| Neither               | 1,031 (89.3)                           | 8,470 (88.4)               | 55,061 (90.0)                | 137,361 (92.5)              |

Yang J, Baer RJ, Berghella V, Chambers C, Chung P, Coker T, et al. Recurrence of preterm birth and early term birth. *Obstet Gynecol* 2016; 128.

The authors provided this information as a supplement to their article.

|                                                                |                           |                            |                                         | Reference                   |
|----------------------------------------------------------------|---------------------------|----------------------------|-----------------------------------------|-----------------------------|
| Infections <sup>§</sup>                                        |                           |                            |                                         |                             |
| Both pregnancies                                               | 2 (0.2)<br>‡              | 28 (0.3)<br>1.0 (0.7-1.4)  | 146 (0.2)<br>0.8 (0.7-1.0) <sup>†</sup> | 438 (0.3)                   |
| First pregnancy only                                           | 19 (1.6)<br>1.3 (0.8-2)   | 125 (1.3)<br>1.0 (0.8-1.2) | 750 (1.2)<br>0.9 (0.9-1.0)              | 1,906 (1.3)                 |
| Second pregnancy only                                          | 17 (1.5)<br>1.2 (0.8-2)   | 107 (1.1)<br>0.9 (0.8-1.1) | 622 (1.0)<br>0.9 (0.8-0.9)              | 1,759 (1.2)                 |
| Neither                                                        | 1,129 (96.7)              | 9,426 (97.3)               | 60,229 (97.5)                           | 145,073 (97.2)<br>Reference |
| Urinary tract infection <sup>  </sup> (no indwelling catheter) |                           |                            |                                         |                             |
| Both pregnancies                                               | 0 (0.0)<br>‡              | 3 (0.0)<br>‡               | 13 (0.0)<br>1.7 (0.8-3.4)               | 19 (0.0)                    |
| First pregnancy only                                           | 21 (1.8)<br>2.3 (1.5-3.5) | 107 (1.1)<br>1.3 (1.1-1.6) | 543 (0.9)<br>1.1 (1.0-1.2)              | 1,233 (0.8)                 |
| Second pregnancy only                                          | 35 (3.0)<br>9 (6.4-12.7)  | 97 (1.0)<br>2.9 (2.4-3.6)  | 297 (0.5)<br>1.4 (1.2-1.6)              | 516 (0.3)                   |
| Neither                                                        | 1,111 (95.2)              | 9,479 (97.9)               | 60,894 (98.6)                           | 147,408 (98.8)<br>Reference |
| Maternal anemia <sup>¶</sup>                                   |                           |                            |                                         |                             |
| Both pregnancies                                               | 19 (1.6)<br>1.2 (0.8-1.9) | 132 (1.4)<br>1.0 (0.8-1.2) | 754 (1.2)<br>0.9 (0.8-0.9)              | 2,074 (1.4)                 |

Yang J, Baer RJ, Berghella V, Chambers C, Chung P, Coker T, et al. Recurrence of preterm birth and early term birth. *Obstet Gynecol* 2016; 128.

The authors provided this information as a supplement to their article.

|                                  |                            |                                         |                                           |                             |
|----------------------------------|----------------------------|-----------------------------------------|-------------------------------------------|-----------------------------|
| First pregnancy only             | 50 (4.3)<br>0.9 (0.6-1.1)  | 506 (5.2)<br>1.0 (0.9-1.1)              | 3,116 (5.0)<br>1.0 (0.9-1.0)              | 7,702 (5.2)                 |
| Second pregnancy only            | 102 (8.7)<br>1.6 (1.3-2)   | 594 (6.1)<br>1.1 (1.0-1.2) <sup>†</sup> | 3,248 (5.3)<br>1.0 (0.9-1.0) <sup>†</sup> | 8,153 (5.5)                 |
| Neither                          | 996 (85.3)                 | 8,454 (87.3)                            | 54,629 (88.5)                             | 131,247 (88)<br>Reference   |
| Maternal drug abuse <sup>#</sup> |                            |                                         |                                           |                             |
| Both pregnancies                 | 3 (0.3)<br>‡               | 11 (0.1)<br>2.9 (1.5-5.5)               | 39 (0.1)<br>1.6 (1.1-2.4)                 | 59 (0.0)                    |
| First pregnancy only             | 6 (0.5)<br>1.4 (0.6-3.1)   | 49 (0.5)<br>1.4 (1.0-1.8) <sup>†</sup>  | 193 (0.3)<br>0.8 (0.7-1.0) <sup>†</sup>   | 561 (0.4)                   |
| Second pregnancy only            | 18 (1.5)<br>7.1 (4.4-11.5) | 71 (0.7)<br>3.3 (2.6-4.3)               | 135 (0.2)<br>1.0 (0.8-1.2)                | 329 (0.2)                   |
| Neither                          | 1,140 (97.7)               | 9,555 (98.6)                            | 61,380 (99.4)                             | 148,227 (99.4)<br>Reference |
| Maternal mental disorder         |                            |                                         |                                           |                             |
| Both pregnancies                 | 6 (0.5)<br>2.8 (1.3-6.4)   | 21 (0.2)<br>1.2 (0.8-1.8)               | 143 (0.2)<br>1.3 (1.0-1.5) <sup>†</sup>   | 276 (0.2)                   |
| First pregnancy only             | 12 (1.0)<br>1.2 (0.7-2.1)  | 102 (1.1)<br>1.2 (1.0-1.5)              | 499 (0.8)<br>0.9 (0.8-1.0)                | 1,328 (0.9)                 |
| Second pregnancy only            | 29 (2.5)                   | 139 (1.4)                               | 569 (0.9)                                 | 1,459 (1.0)                 |

Yang J, Baer RJ, Berghella V, Chambers C, Chung P, Coker T, et al. Recurrence of preterm birth and early term birth. *Obstet Gynecol* 2016; 128.

The authors provided this information as a supplement to their article.

|                                          |                             |                               |                                |                             |
|------------------------------------------|-----------------------------|-------------------------------|--------------------------------|-----------------------------|
|                                          | 2.6 (1.8-3.8)               | 1.5 (1.2-1.8)                 | 0.9 (0.9-1.0)                  |                             |
| Neither                                  | 1,120 (96.0)                | 9,424 (97.3)                  | 60,536 (98.0)                  | 146,113 (97.9)<br>Reference |
| Cesarean delivery at the first pregnancy |                             |                               |                                |                             |
| Yes                                      | 384 (32.9)<br>1.5 (1.3-1.7) | 2,864 (29.6)<br>1.3 (1.2-1.4) | 19,633 (31.8)<br>1.4 (1.4-1.5) | 36,420 (24.4)               |
| No                                       | 783 (67.1)                  | 6,822 (70.4)                  | 42,114 (68.2)                  | 112,756 (75.6)<br>Reference |

\* Value missing where the sum of numbers for categories do not equal the total sample size.

† 95% confidence interval does not include 1.0.

‡ Not computed due to frequency < 5.

§ ICD-9 codes 647.0 – 647.9 reported on hospital discharge record. Infections include: syphilis, gonorrhea, other venereal diseases, tuberculosis, malaria, rubella, other viral disease, other infectious and parasitic disease, unspecified infection or infestation.

|| ICD-9 code 646.6 reported on hospital discharge record. Women with an indwelling catheter were excluded.

¶ ICD-9 codes 648.2, 280.0 – 285.9 reported on hospital discharge record.

# ICD-9 codes 648.3, 304.0 – 304.9, 305.2 – 305.9 reported on hospital discharge record.

Yang J, Baer RJ, Berghella V, Chambers C, Chung P, Coker T, et al. Recurrence of preterm birth and early term birth. *Obstet Gynecol* 2016; 128.

The authors provided this information as a supplement to their article.

**Appendix 5. Maternal Characteristics Associated With Preterm Birth (Before 37 Weeks of Gestation) and Early Term Birth (37 to 38 Weeks) in the Second Pregnancy**

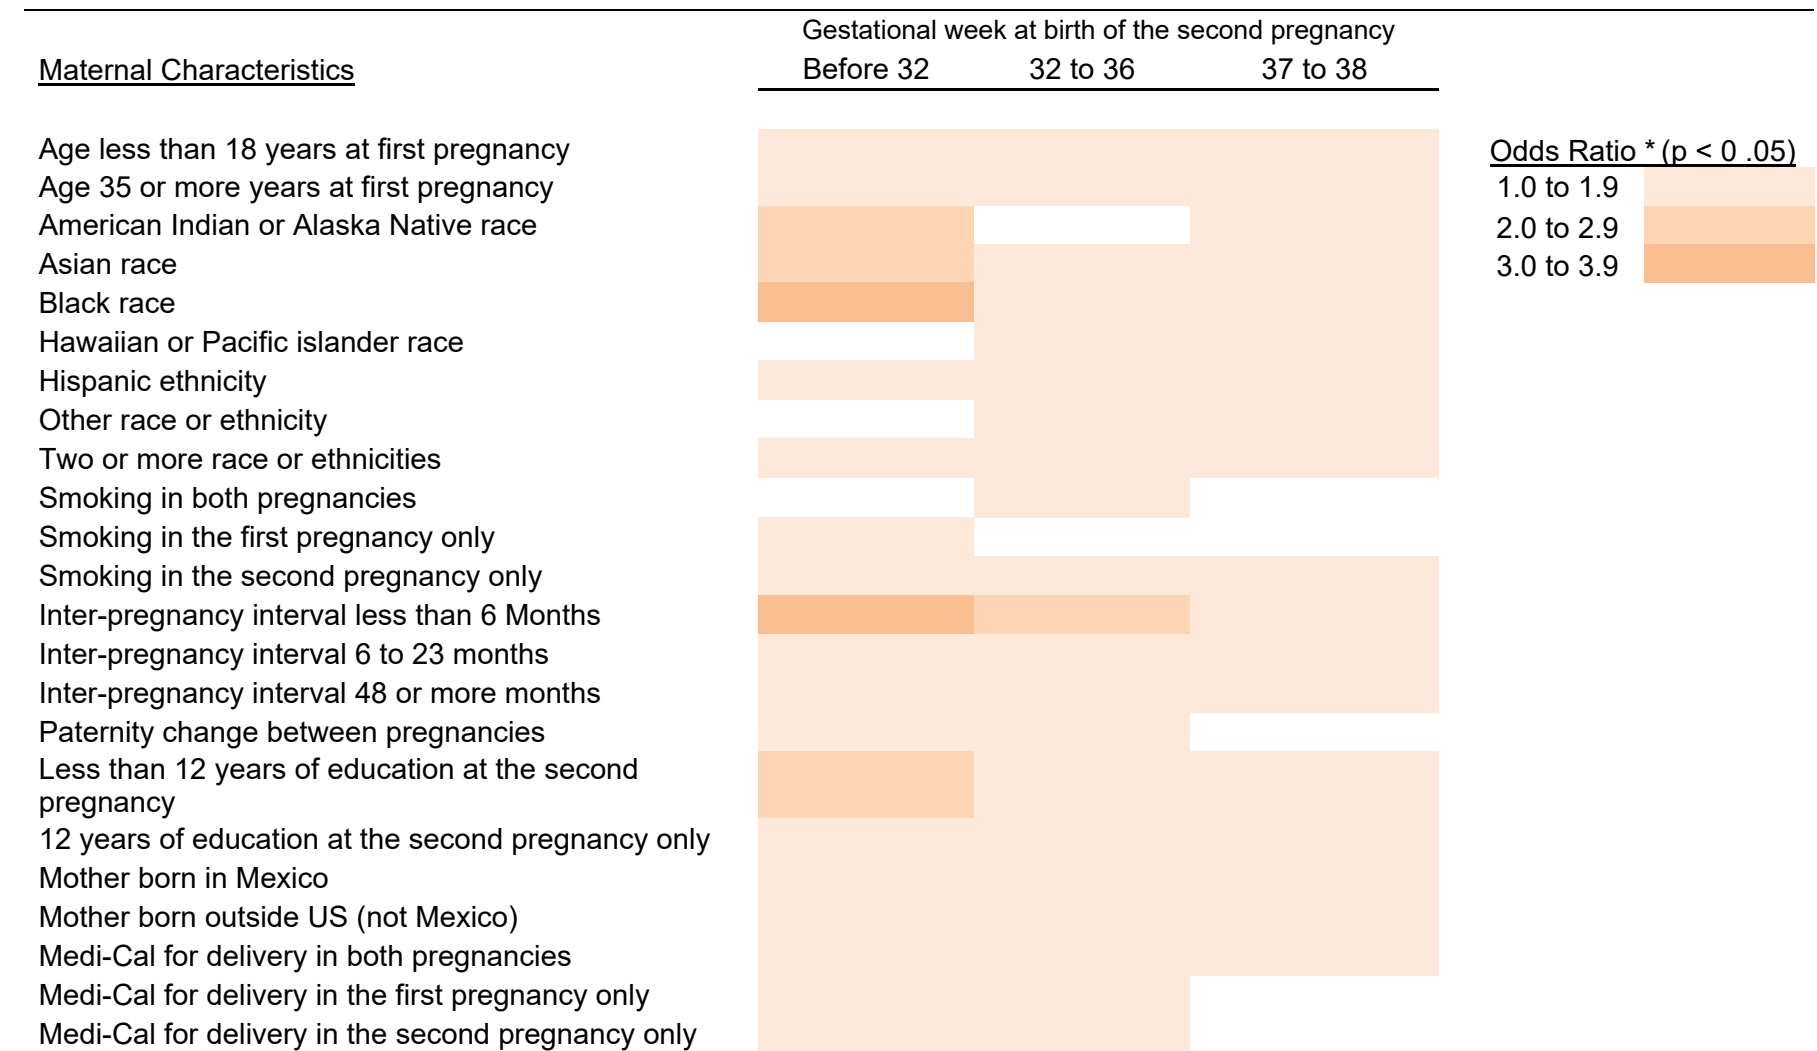

\* Odds ratio was calculated by the crude logistic regression analyses

Yang J, Baer RJ, Berghella V, Chambers C, Chung P, Coker T, et al. Recurrence of preterm birth and early term birth. *Obstet Gynecol* 2016; 128.

The authors provided this information as a supplement to their article.



Yang J, Baer RJ, Berghella V, Chambers C, Chung P, Coker T, et al. Recurrence of preterm birth and early term birth. *Obstet Gynecol* 2016; 128.

The authors provided this information as a supplement to their article.

**Appendix 6. Distribution of Gestational Length in the Second Pregnancy by Gestational Length in the First Pregnancy**

| Gestational weeks at<br>delivery of the first<br>pregnancy | Gestational weeks at delivery of the second pregnancy |      |       |      |       |       |
|------------------------------------------------------------|-------------------------------------------------------|------|-------|------|-------|-------|
|                                                            | <37                                                   |      | 37-38 |      | >38   |       |
|                                                            | n                                                     | %    | n     | %    | n     | %     |
| <32                                                        | 212                                                   | 22.7 | 273   | 29.2 | 450   | 48.1  |
| 32                                                         | 58                                                    | 17.4 | 124   | 37.1 | 152   | 45.5  |
| 33                                                         | 103                                                   | 18.5 | 219   | 39.4 | 234   | 42.1  |
| 34                                                         | 203                                                   | 17.4 | 432   | 37.0 | 531   | 45.5  |
| 35                                                         | 285                                                   | 13.4 | 801   | 37.6 | 1044  | 49.0  |
| 36                                                         | 488                                                   | 11.5 | 1726  | 40.7 | 2032  | 47.9  |
| 37                                                         | 858                                                   | 8.4  | 4092  | 40.2 | 5230  | 51.40 |
| 38                                                         | 1399                                                  | 5.4  | 9490  | 36.7 | 14948 | 57.9  |
| >38                                                        | 3295                                                  | 2.8  | 26744 | 22.6 | 88466 | 74.70 |

Yang J, Baer RJ, Berghella V, Chambers C, Chung P, Coker T, et al. Recurrence of preterm birth and early term birth. *Obstet Gynecol* 2016; 128.

The authors provided this information as a supplement to their article.
